# Supplementary material
Source: HighWire-hosted journal article supplement (http://www.ajnr.org/highwire/filestream/62590/field_highwire_adjunct_files/0/18-00362.pdf)
Supplement: 18-00362.pdf [file 18-00362.pdf]

**On-line Table: Characteristics of patients with treatment failure (n = 17)**

| Patient | Age (yr)/Sex | Primary Tumor Location | HPV Status | TNM Stage | Location of Recurrence       | Histology Confirmation | Time Interval between TF and Treatment Completion (mo) | Adjuvant Treatment                                      |
|---------|--------------|------------------------|------------|-----------|------------------------------|------------------------|--------------------------------------------------------|---------------------------------------------------------|
| 1       | 47/M         | Oropharynx             | Unknown    | T4aN2bM0  | Nodes                        | Yes                    | 12                                                     | Neck dissection                                         |
| 2       | 30/M         | Oropharynx             | Positive   | T1N2bM0   | Nodes                        | Yes                    | 6                                                      | Neck dissection                                         |
| 3       | 48/M         | Oropharynx             | Positive   | T1N2bM0   | Nodes                        | Yes                    | 11                                                     | Neck dissection                                         |
| 4       | 60/M         | Oropharynx             | Positive   | T4aN1M0   | Primary tumor                | Yes                    | 9                                                      | Partial glossectomy, tonsillectomy, neck dissection     |
| 5       | 62/F         | Oropharynx             | Negative   | T3N0M0    | Both primary tumor and nodes | No                     | 13                                                     | Radical surgery, chemotherapy                           |
| 6       | 65/M         | Oropharynx             | Negative   | T3N0M0    | Primary tumor                | Yes                    | 10                                                     | Radical surgery                                         |
| 7       | 69/M         | Oropharynx             | Positive   | T2N1M0    | Nodes                        | Yes                    | 12                                                     | Neck dissection                                         |
| 8       | 69/F         | Oropharynx             | Negative   | T4aN2cM0  | Nodes                        | Yes                    | 16                                                     | Neck dissection                                         |
| 9       | 61/M         | Oropharynx             | Positive   | T3N2bM0   | Primary tumor                | Yes                    | 5                                                      | Partial glossectomy, submandibulectomy, neck dissection |
| 10      | 84/M         | Oral cavity            | Unknown    | T4aN2cM0  | Nodes                        | No                     | 9                                                      | Radical surgery, chemotherapy                           |
| 11      | 43/M         | Oral cavity            | Unknown    | T3N1M0    | Nodes                        | Yes                    | 5                                                      | Radical surgery, chemotherapy                           |
| 12      | 58/M         | Oral cavity            | Unknown    | T2N2bM0   | Nodes                        | No                     | 13                                                     | Radical surgery                                         |
| 13      | 58/M         | Larynx                 | Unknown    | T2N0M0    | Primary tumor                | Yes                    | 8                                                      | Total laryngectomy, neck dissection                     |
| 14      | 52/M         | Larynx                 | Unknown    | T3N2cM0   | Primary tumor                | No                     | 7                                                      | Radical surgery                                         |
| 15      | 46/M         | Nasopharynx            | Unknown    | T2N1M0    | Nodes                        | Yes                    | 10                                                     | Neck dissection                                         |
| 16      | 63/M         | Nasopharynx            | Unknown    | T2N0M0    | Primary tumor                | Yes                    | 24                                                     | Chemoradiation                                          |
| 17      | 64/M         | Hypopharynx            | Unknown    | T3N2bM0   | Nodes                        | Yes                    | 6                                                      | Total laryngectomy, neck dissection                     |

**Note:**—HPV indicates human papillomavirus; TNM, Tumor, Node, Metastasis.
